# Supplementary material
Source: PubMed Central journal article supplement (PMC2572794)
Supplement: blood-2008-05-157016_1.pdf [file blood-2008-05-157016_1.pdf]

| Donor | Age | Apheresis Date | Flu Vaccination (season)         |
|-------|-----|----------------|----------------------------------|
| A     | 48  | March 06       | not for last three year          |
| B     | 50  | May 07         | 05-06; 06-07; 07-08              |
| C     | 45  | June 07        | not sure for 05-06; 06-07; 07-08 |
| E     | 34  | August 07      | 06-07                            |
| D     | 26  | November 07    | not for last three year          |
