# Supplementary material
Source: PubMed Central journal article supplement (PMC2572794)
Supplement: blood-2008-05-157016_2.pdf [file blood-2008-05-157016_2.pdf]

| Exp | Donor. | Mouse No | Vaccine (route)         | % of FluM1-specific CD8 <sup>+</sup> T cells |          |       |              |
|-----|--------|----------|-------------------------|----------------------------------------------|----------|-------|--------------|
|     |        |          |                         | Blood                                        | Tetramer |       | IFN $\gamma$ |
|     |        |          |                         |                                              | Spleen   | Lung  | Spleen       |
| I   | A      | 1        | PBS (i.p., i.v., i.n.)  | 0.05                                         | 0.09     | 0.04  | ND           |
|     |        | 2        | LAIV (i.p., i.v., i.n.) | 0.06                                         | 0.04     | 0.04  | ND           |
|     |        | 3        | LAIV (i.p., i.v., i.n.) | 0.16*                                        | 0.11     | 0.15  | ND           |
|     |        | 4        | LAIV (i.p., i.v., i.n.) | 0.12*                                        | 0.25     | 0.16  | ND           |
|     |        | 5        | LAIV (i.p., i.v., i.n.) | 0.05                                         | 0.03     | 0.02  | ND           |
|     |        | 6        | LAIV (i.p., i.v., i.n.) | 0.12*                                        | 0.04     | 0.03  | ND           |
|     |        | 7        | LAIV (i.p., i.v., i.n.) | 0.33*                                        | 0.10     | 0.13  | ND           |
| II  | B      | 1        | TT (i.p.)               | 0.03                                         | 0.03     | 0.01  | 0.08         |
|     |        | 2        | TT (i.p.)               | 0.04                                         | 0.02     | <0.01 | <0.01        |
|     |        | 3        | TT (i.p.)               | 0.04                                         | 0.02     | 0.01  | 0.10         |
|     |        | 4        | LAIV (i.p., i.v.)       | 0.22*                                        | 0.05     | 0.05  | 0.20         |
|     |        | 5        | LAIV (i.p., i.v.)       | 0.37*                                        | 0.22     | 0.17  | 0.43         |
|     |        | 6        | LAIV (i.p., i.v.)       | 0.50*                                        | 0.37     | 0.26  | 0.89         |
| III | C      | 1        | TT (i.p.)               | <0.01                                        | 0.02     | 0.02  | ND           |
|     |        | 2        | TT (i.p.)               | <0.01                                        | 0.02     | 0.02  | 0.02         |
|     |        | 3        | LAIV (i.p., i.v.)       | <0.01                                        | 0.04     | 0.07  | 0.02         |
|     |        | 4        | LAIV (i.p., i.v.)       | 0.07                                         | 0.07     | 0.07  | 0.03         |
|     |        | 5        | LAIV (i.p., i.v.)       | 0.02                                         | 0.02     | 0.02  | 0.02         |
| IV  | D      | 1        | TT (i.p.)               | 0.02                                         | 0.04     | 0.05  | 0.03         |
|     |        | 2        | TT (i.p.)               | 0.01                                         | 0.04     | 0.03  | 0.01         |
|     |        | 3        | LAIV (i.p., i.v.)       | 0.28*                                        | 0.19     | 0.15  | 0.13         |
|     |        | 4        | LAIV (i.p., i.v.)       | 1.27*                                        | 0.91     | 0.87  | 0.88         |

ND, not done; \* positive response defined as the percentage of FluM1 tetramer<sup>+</sup>CD8<sup>+</sup> T cells in the group vaccinated with LAIV two-fold higher than the mean + 2SEM in the group of control mice vaccinated with PBS or TT.
