# Supplementary material
Source: PubMed Central journal article supplement (PMC2572794)
Supplement: blood-2008-05-157016_3.pdf [file blood-2008-05-157016_3.pdf]

| Exp | Donor. | Mouse No | Vaccine (route)        | % of FluM1-specific CD8 <sup>+</sup> T cells |          |      |              |
|-----|--------|----------|------------------------|----------------------------------------------|----------|------|--------------|
|     |        |          |                        | Blood                                        | Tetramer |      | IFN $\gamma$ |
|     |        |          |                        |                                              | Spleen   | Lung | Spleen       |
| I   | A      | 1        | PBS (i.p., i.v., i.n.) | 0.05                                         | ND       | ND   | ND           |
|     |        | 8        | TIV (i.p., i.v., i.n.) | 0.20*                                        | ND       | ND   | ND           |
|     |        | 9        | TIV (i.p., i.v., i.n.) | 0.18*                                        | ND       | ND   | ND           |
| II  | C      | 1        | TT (i.p.)              | <0.01                                        | 0.02     | 0.02 | ND           |
|     |        | 2        | TT (i.p.)              | <0.01                                        | 0.02     | 0.02 | 0.02         |
|     |        | 6        | TIV (i.p., i.v.)       | 0.17*                                        | 0.12     | 0.12 | 0.10         |
|     |        | 7        | TIV (i.p., i.v.)       | 0.02                                         | 0.02     | 0.02 | 0.02         |
|     |        | 8        | TIV (i.p., i.v.)       | 0.05                                         | 0.08     | 0.07 | 0.03         |
| III | E      | 1        | TT (i.p.)              | <0.01                                        | 0.09     | 0.08 | 0.07         |
|     |        | 2        | TT (i.p.)              | 0.08                                         | 0.29     | 0.54 | 0.06         |
|     |        | 3        | TT (i.p.)              | 0.04                                         | 0.14     | 0.06 | 0.07         |
|     |        | 4        | TIV (i.p., i.v.)       | 0.35*                                        | ND       | ND   | ND           |
|     |        | 5        | TIV (i.p., i.v.)       | 0.60*                                        | ND       | ND   | ND           |
|     |        | 6        | TIV (i.p., i.v.)       | 0.18*                                        | ND       | ND   | ND           |
|     |        | 7        | TIV (i.p., i.v.)       | 0.88*                                        | 0.49     | 0.55 | 0.63         |
|     |        | 8        | TIV (i.p., i.v.)       | 0.49*                                        | 0.37     | 0.48 | 0.47         |
|     |        | 9        | TIV (i.p., i.v.)       | 1.20*                                        | 1.00     | 1.42 | 0.78         |
|     |        | 10       | TIV (i.p., i.v.)       | 0.44*                                        | 0.65     | 0.84 | 0.25         |
| IV  | E      | 11       | PBS (i.p., i.v.)       | 0.10                                         | ND       | ND   | ND           |
|     |        | 12       | PBS (i.p., i.v.)       | 0.05                                         | ND       | ND   | ND           |
|     |        | 13       | TIV (i.p., i.v.)       | 0.13*                                        | 0.12     | 0.12 | 0.10         |
|     |        | 14       | TIV (i.p., i.v.)       | 0.23*                                        | 0.22     | 0.19 | 0.14         |
|     |        | 15       | TIV (i.p., i.v.)       | 0.25*                                        | 0.24     | 0.25 | 0.08         |
| V   | D      | 1        | TT (i.p.)              | 0.02                                         | 0.04     | 0.05 | 0.03         |
|     |        | 2        | TT (i.p.)              | 0.01                                         | 0.04     | 0.03 | 0.01         |
|     |        | 5        | TIV (i.p., i.v.)       | 0.65*                                        | 0.43     | 0.31 | 0.39         |
|     |        | 6        | TIV (i.p., i.v.)       | 0.83*                                        | 0.49     | 0.53 | 0.32         |

ND, not done; \* positive response defined as the percentage of FluM1 tetramer<sup>+</sup>CD8<sup>+</sup> T cells in the group vaccinated with TIV two-fold higher than the mean + 2SEM in the group of control mice vaccinated with PBS or TT.
